# Supplementary material
Source: HighWire-hosted journal article supplement (https://genome.cshlp.org/content/suppl/2005/08/19/15.9.1232)
Supplement: Supplemental_fig1.pdf [file Supplemental_fig1.pdf]

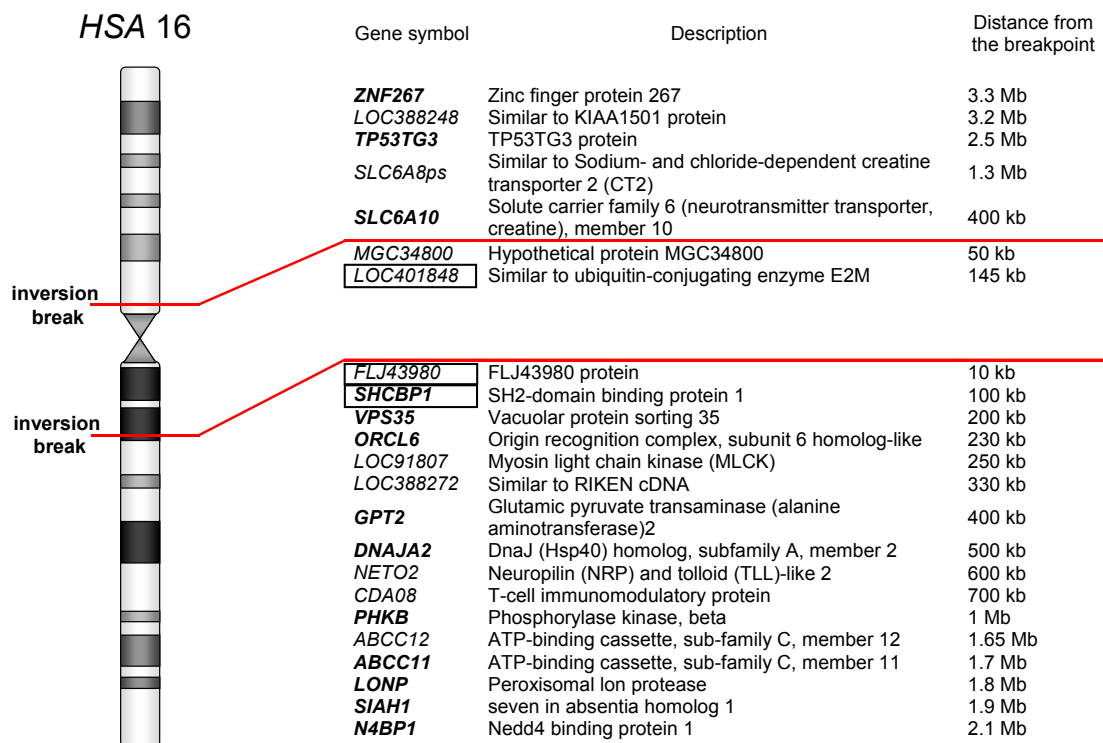

Supplemental figure 1

**Supplemental Figure 1:** Ideogram of human chromosome 16 with the approximate positions of genes in the regions flanking the breakpoints according to the Ensembl database. The genes marked in bold type are represented on the Affymetrix array U95; none of these genes exhibited a difference in level of expression between chimpanzee and human (Caceres et al. 2003; Enard et al. 2002; Karaman et al., 2003; Uddin et al. 2004). Genes whose symbols are boxed were tested by real-time RT-PCR analysis in this study. Red lines indicate the breakpoints of the *PTR XVI* inversion.
