# Supplementary material
Source: HighWire-hosted journal article supplement (https://genome.cshlp.org/content/suppl/2005/08/19/15.9.1232)
Supplement: Supplemental_table1.pdf [file Supplemental_table1.pdf]

# Supplemental Table 1

PCR analysis of human and chimpanzee BACs used to identify the breakpoint regions. Primers were designed according to the sequences of the human BACs.

| Primer | <i>Sequence 5' - 3'</i> | Position on<br><i>HSA</i> BAC<br>CTD-2144E22 | Position on <i>HSA</i><br>BAC RP11-696P19 | Present on <i>PTR</i><br>BAC RP43-<br>001I03 | Present on <i>PTR</i><br>BAC RP43-<br>007E19 |
|--------|-------------------------|----------------------------------------------|-------------------------------------------|----------------------------------------------|----------------------------------------------|
| P1f    | TACCCATTAGCATCGCCTTC    |                                              | 104781                                    |                                              | +                                            |
| P1r    | CTGCTCCACGGCTTAAATTC    |                                              | 104962                                    | -                                            |                                              |
| P2f    | GCAGTTGTCATCGAATGGAA    |                                              | 114667                                    |                                              | -                                            |
| P2r    | TCGATGACCAATTTCTGGAAG   |                                              | 114943                                    | -                                            |                                              |
| P3f    | ACACCTCAGAGTTCCGGTTG    |                                              | 115032                                    |                                              | -                                            |
| P3r    | GCCTTGCATCACATTCAGA     |                                              | 115224                                    | +                                            |                                              |
| P4f    | AGAAAGGCAAGGGGTTTCAT    | 139229                                       |                                           | +                                            | -                                            |
| P4r    | CAGGCAGAGTCACAGTGGAA    | 139405                                       |                                           |                                              |                                              |
| P5f    | CAGTGAGCAAGCCAAATTCA    | 144168                                       |                                           | +                                            | -                                            |
| P5r    | TCCCCACCGGACTGTTATAG    | 144360                                       |                                           |                                              |                                              |
| P6f    | TACTCACCTCCCTCATTGC     | 162183                                       |                                           | -                                            | +                                            |
| P6r    | CTCCATTACGGAGCACA       | 162365                                       |                                           |                                              |                                              |
| P7f    | TGAGAGCAACTGAGGTTTGC    | 166997                                       |                                           | -                                            | +                                            |
| P7r    | GCCAGGTATGCGATGAAAAT    | 167170                                       |                                           |                                              |                                              |
