# Supplementary material
Source: HighWire-hosted journal article supplement (https://genome.cshlp.org/content/suppl/2005/08/19/15.9.1232)
Supplement: Supplemental_table2.pdf [file Supplemental_table2.pdf]

**Supplemental Table 2**

Expression differences manifested by genes close to the inversion breakpoints between humans and other primates as determined by real-time PCR

|                  | Cell<br>type | <i>Fibroblasts</i>                        | <i>Lymphoblastoid cell lines</i>          |                                           |                                             |                                           |
|------------------|--------------|-------------------------------------------|-------------------------------------------|-------------------------------------------|---------------------------------------------|-------------------------------------------|
|                  |              | <i>HSA</i> vs. <i>PTR</i>                 | <i>HSA</i> vs. <i>PTR</i>                 | <i>HSA</i> vs. <i>PPA</i>                 | <i>HSA</i> vs. <i>GGO</i>                   | <i>HSA</i> vs. <i>PPY</i>                 |
| Genes            |              |                                           |                                           |                                           |                                             |                                           |
| <i>MGC34800</i>  |              | Not expressed                             | Not expressed                             | Not expressed                             | Not expressed                               | Not expressed                             |
| <i>LOC401848</i> |              | No difference                             | No difference                             | No difference                             | No difference                               | No difference                             |
| <i>FLJ43980</i>  |              | Not expressed                             | 4-fold lower<br>expression in <i>HSA</i>  | 3-fold higher<br>expression in <i>HSA</i> | Not expressed                               | Not expressed                             |
| <i>SHCBP1</i>    |              | 2-fold higher<br>expression in <i>HSA</i> | 2-fold higher<br>expression in <i>HSA</i> | 6-fold higher<br>expression in <i>HSA</i> | 100-fold higher<br>expression in <i>HSA</i> | 4-fold higher<br>expression in <i>HSA</i> |
