# Supplementary material
Source: HighWire-hosted journal article supplement (https://genome.cshlp.org/content/suppl/2005/08/19/15.9.1232)
Supplement: Supplemental_table3.pdf [file Supplemental_table3.pdf]

### Supplemental Table 3

PCR-products used as probes to identify gorilla breakpoint-spanning BACs. Primers were designed according to the sequence of human BACs.

| Primers | Sequence 5'-3'       | <i>HSA</i> BAC used to design the primers | Position of the PCR products on the BAC (bp) |
|---------|----------------------|-------------------------------------------|----------------------------------------------|
| P8f     | GCTCTGGATTCCCTCAAAAA | RP11-696P19                               | 71842-72044                                  |
| P8r     | CAGCATCCCCATCTCTTTGT |                                           |                                              |
| P9f     | GGAAAACAAGGGGCCTAAAA | RP11-696P19                               | 119256-119451                                |
| P9r     | TCTATCCAGGGCAGGAACAG |                                           |                                              |
| P4f     | AGAAAGGCAAGGGGTTTCAT | CTD-2144E22                               | 139229-139405                                |
| P4r     | CAGGCAGAGTCACAGTGGAA |                                           |                                              |
| P5f     | CAGTGAGCAAGCCAAATTCA | CTD-2144E22                               | 144168-144360                                |
| P5r     | TCCCCACCGGACTGTTATAG |                                           |                                              |
| P6f     | TACTCACCTCCCTCATTGC  | CTD-2144E22                               | 162183-162365                                |
| P6r     | CTCCATTACGGAGCACA    |                                           |                                              |
| P7f     | TGAGAGCAACTGAGGTTTGC | CTD-2144E22                               | 166997-167170                                |
| P7r     | GCCAGGTATGCGATGAAAAT |                                           |                                              |
| P10f    | ACGGCTTGGTTTTCACTGTT | CTD-2522B17                               | 56162-56364                                  |
| P10r    | CTCCCCCATAAGAACGATCA |                                           |                                              |
